# Supplementary material for: Genome Wide Analysis of Nucleotide-Binding Site Disease Resistance Genes in Brachypodium distachyon
Source: Comp Funct Genomics. 2012 May 28;2012:418208. doi: 10.1155/2012/418208 (PMC3368180; doi:10.1155/2012/418208)
Supplement: Supplementary file 1 — Supplemental file 1. The summary information of 126 regular NBS-LRR genes. Supplemental file 2. The summary information of 113 non-regular NBS-LRR genes. Supplemental file 3. The six modified gene models. Supplemental file 4. The conserved motifs of 126 regular NBS-LRR genes. Supplemental file 5. The gene clusters of 126 regular NBS-LRR genes. [file 418208.f1.xls]

## Sheet: Sheet1
Regular NBS-LRR	HMMER E-value	IBI	Amino Acid length	Ortholog	Type	Sum of all the EST	Diurnally sampled root ESTs	Diurnally sampled flowers ESTs	Diurnally sampled leaves&stem EST	Drought_stress leaf ESTs	Drought-stress flower ESTs	biotic and abiotic stress EST	Bd21 EST superpool	Promoter_CBF	Promoter_GCC CORE	Promoter_WBOX
NBS-LRR1	5.7e-134	Bradi4g10037.1m1	1027	AT3G14470.1, Os11g44960.1	CNL	3	2	0	1	0	0	0	0	1	1	22
NBS-LRR2	5.7e-134	Bradi4g10037.1m2	1014	AT3G14470.1, Os11g44960.1	CNL	74	27	12	23	1	0	8	3	5	0	26
NBS-LRR3	1.4e-81	Bradi2g39517.1	1220	AT1G59780.1, Os08g42670.1	CNL	11	2	5	2	2	0	0	0	0	5	23
NBS-LRR4	9.8e-81	Bradi1g55080.1	902	AT3G07040.1, Os07g08890.1	CNL	14	0	5	2	2	0	0	5	0	7	16
NBS-LRR5	3.5e-80	Bradi1g00227.1m	784	AT3G07040.1, Os10g04674.1	CNL	3	1	0	0	2	0	0	0	5	3	16
NBS-LRR6	1.9e-77	Bradi5g01167.1	915	AT3G07040.1, Os11g35580.1	CNL	5	3	0	1	0	0	1	0	0	4	13
NBS-LRR7	9e-77	Bradi3g41960.1	1205	AT3G14470.1, Os08g43050.1	CNL	0	0	0	0	0	0	0	0	6	1	11
NBS-LRR8	1.7e-76	Bradi5g17527.1	925	AT3G07040.1, Os04g46300.1	CNL	0	0	0	0	0	0	0	0	6	0	2
NBS-LRR9	1.7e-76	Bradi4g09247.1	919	AT3G07040.1, Os10g21400.1	CNL	35	16	4	7	2	1	5	0	6	2	18
NBS-LRR10	1.7e-76	Bradi1g29427.2	851	AT1G50180.1, Os11g41540.1	CNL	53	17	18	10	2	4	2	0	1	6	32
NBS-LRR11	1.8e-76	Bradi1g29427.1	868	AT1G50180.1, Os11g41540.1	CNL	48	14	18	10	0	4	2	0	1	6	32
NBS-LRR12	3e-76	Bradi4g06970.1	919	AT3G07040.1, Os08g16120.1	CNL	1	1	0	0	0	0	0	0	0	8	17
NBS-LRR13	1.3e-75	Bradi2g21360.1	1130	AT3G14470.1, Os05g41290.1	CNL	0	0	0	0	0	0	0	0	1	2	20
NBS-LRR14	4.2e-75	Bradi2g52840.1	1111	AT3G14470.1, Os05g41290.1	CNL	5	2	3	0	0	0	0	0	0	0	24
NBS-LRR15	5.1e-75	Bradi1g29441.1	854	AT1G50180.1, Os11g41540.1	CNL	19	13	4	2	0	0	0	0	10	5	14
NBS-LRR16	4.2e-73	Bradi5g03110.1	911	AT3G07040.1, Os11g12330.1	CNL	39	36	0	0	1	0	2	0	1	0	11
NBS-LRR17	2.4e-72	Bradi4g21890.1	908	AT3G07040.1, Os11g11960.1	CNL	89	35	22	18	0	6	4	4	2	2	7
NBS-LRR18	2.6e-72	Bradi1g01377.1	915	AT3G07040.1, Os10g04110.1	CNL	22	0	10	7	0	2	1	2	0	0	31
NBS-LRR19	4.1e-72	Bradi4g33467.1	880	AT1G58410.1, Os10g10360.1	CN	10	8	0	2	0	0	0	0	2	0	17
NBS-LRR20	1.8e-71	Bradi4g14697.1	875	AT3G07040.1, Os08g32880.1	CNL	11	3	8	0	0	0	0	0	6	2	15
NBS-LRR21	2.3e-71	Bradi4g04655.1	948	AT3G07040.1, Os12g37740.1	CNL	2	0	1	0	0	0	0	1	2	2	41
NBS-LRR22	1.9e-70	Bradi4g04662.1	940	AT3G07040.1, Os12g37770.1	CNL	0	0	0	0	0	0	0	0	5	8	24
NBS-LRR23	5e-70	Bradi2g37172.1	896	AT3G07040.1, Os10g04110.1	CNL	1	0	1	0	0	0	0	0	6	0	17
NBS-LRR24	2.9e-69	Bradi4g10060.1	1022	AT3G14470.1, Os11g45050.1	CNL	16	0	0	0	1	2	9	4	2	0	18
NBS-LRR25	4.5e-69	Bradi4g10171.1	847	AT3G14470.1, Os11g45180.1	NL	27	9	1	5	0	0	8	4	2	0	13
NBS-LRR26	4.9e-69	Bradi4g10207.1	839	AT3G14470.1, Os11g45050.1	NL	49	20	14	3	0	0	8	4	0	0	13
NBS-LRR27	5.5e-69	Bradi5g02367.1	1531	AT3G14470.1, Os08g20000.1	NL	1	0	0	1	0	0	0	0	1	0	29
NBS-LRR28	5.8e-69	Bradi4g10017.1	862	AT3G14470.1, Os11g45050.1	NL	15	10	1	0	4	0	0	0	0	1	25
NBS-LRR29	6.6e-69	Bradi4g10030.1	1012	AT3G14470.1, Os11g45050.1	CNL	54	23	14	2	1	0	10	4	0	0	17
NBS-LRR30	1.5e-68	Bradi4g12877.1	946	AT3G07040.1, Os12g37770.1	CNL	4	0	1	1	0	2	0	0	9	5	19
NBS-LRR31	2.3e-68	Bradi1g01407.1	941	AT3G07040.1, Os10g04110.1	CNL	10	0	1	1	0	1	4	3	1	0	20
NBS-LRR32	2.7e-68	Bradi4g10180.1	1019	AT3G14470.1, Os11g45180.1	CNL	52	16	11	15	2	0	7	1	9	5	6
NBS-LRR33	3.5e-68	Bradi4g05870.1	1245	AT3G14460.1, Os10g04120.1	CNL	14	11	0	0	0	0	0	3	2	0	17
NBS-LRR34	5.1e-68	Bradi2g39847.1	916	AT3G07040.1, Os01g36640.1	CNL	3	1	0	1	0	1	0	0	18	7	10
NBS-LRR35	9.6e-68	Bradi2g39091.1	963	AT5G43470.1, Os11g43700.1	CN	9	3	1	0	0	1	1	3	2	1	22
NBS-LRR36	1.9e-67	Bradi3g22520.1	923	AT3G07040.1, Os10g07978.1	CNL	2	0	2	0	0	0	0	0	0	0	18
NBS-LRR37	3e-67	Bradi4g04657.1	932	AT3G07040.1, Os12g37740.1	CNL	1	0	0	0	0	0	0	1	2	1	29
NBS-LRR38	4.4e-67	Bradi4g20527.1	927	AT3G07040.1, Os11g16470.1	CN	7	3	0	3	1	0	0	0	0	0	27
NBS-LRR39	5.2e-67	Bradi3g03882.1	914	AT3G07040.1, Os08g10440.1	CNL	9	4	5	0	0	0	0	0	3	0	35
NBS-LRR40	5.8e-67	Bradi4g21842.1	841	AT3G07040.1, Os11g11960.1	CNL	2	0	0	0	0	1	0	1	9	0	12
NBS-LRR41	6.6e-67	Bradi1g01387.1	923	AT3G46730.1, Os10g04110.1	CNL	3	3	0	0	0	0	0	0	0	4	24
NBS-LRR42	6.8e-67	Bradi4g01687.1	949	AT3G46730.1, Os11g43700.1	CNL	25	24	1	0	0	0	0	0	3	0	27
NBS-LRR43	6.8e-67	Bradi4g01687.2	951	AT3G46730.1, Os11g43700.1	CNL	29	28	1	0	0	0	0	0	3	0	27
NBS-LRR44	1.1e-66	Bradi4g10220.1	877	AT3G14470.1, Os11g45050.1	CNL	3	1	2	0	0	0	0	0	0	1	27
NBS-LRR45	1.2e-66	Bradi2g39207.1	909	AT3G07040.1, Os10g04110.1	CNL	28	4	12	11	1	0	0	0	0	0	20
NBS-LRR46	2e-66	Bradi1g01257.1	951	AT3G07040.1, Os10g04110.1	CNL	36	9	13	7	2	4	1	0	6	8	8
NBS-LRR47	4.3e-66	Bradi2g60434.1	918	AT3G46530.1, Os11g43700.1	CNL	12	1	5	6	0	0	0	0	10	7	12
NBS-LRR48	4.6e-66	Bradi5g22547.1	1571	AT3G14460.1, Os06g49390.1	CNL	22	10	5	5	1	0	0	1	1	0	18
NBS-LRR49	6.2e-66	Bradi2g37166.1	957	AT3G46730.1, Os10g04110.1	CNL	13	1	3	7	2	0	0	0	2	3	8
NBS-LRR50	8.9e-66	Bradi5g22842.1	1536	AT3G14470.1, Os06g49390.1	CN	26	16	5	3	1	0	0	1	1	0	23
NBS-LRR51	1e-65	Bradi4g38170.1	839	AT3G14470.1, Os06g15750.1	NL	1	0	0	1	0	0	0	0	0	2	37
NBS-LRR52	1.1e-65	Bradi2g03060.1	1020	AT3G14470.1, Os11g45180.1	CNL	69	14	20	17	2	3	3	10	4	1	20
NBS-LRR53	7.6e-65	Bradi3g03874.1	925	AT3G46530.1, Os08g10440.1	CNL	17	0	8	7	0	0	0	2	1	1	15
NBS-LRR54	8.6e-65	Bradi2g35767.1	1484	AT3G14460.1, Os07g04900.1	CNL	15	0	9	3	0	1	0	2	0	0	14
NBS-LRR55	1.5e-64	Bradi3g19967.1	930	AT3G14470.1, Os08g19980.1	CNL	0	0	0	0	0	0	0	0	0	0	14
NBS-LRR56	2.8e-64	Bradi2g09480.1	1300	AT3G14470.1, Os01g15580.1	CNL	0	0	0	0	0	0	0	0	2	4	25
NBS-LRR57	9.8e-64	Bradi3g03587.1	923	AT3G46730.1, Os08g10440.1	CN	5	0	0	2	0	0	0	3	1	0	9
NBS-LRR58	1e-63	Bradi2g39247.1	927	AT3G07040.1, Os11g43700.1	CNL	37	0	14	20	0	0	1	2	10	6	23
NBS-LRR59	1.4e-63	Bradi1g48747.1	975	AT3G07040.1, Os06g06380.1	CNL	4	1	1	2	0	0	0	0	7	6	20
NBS-LRR60	2.3e-63	Bradi5g15560.1	920	AT4G26090.1, Os04g43440.1	CNL	10	3	2	3	0	2	0	0	2	0	13
NBS-LRR61	2.5e-63	Bradi1g29658.2	1283	AT3G14470.1, Os02g16270.1	CN	9	2	0	5	0	1	0	1	3	1	14
NBS-LRR62	2.6e-63	Bradi1g29658.1	1307	AT3G14470.1, Os02g16270.1	CN	18	8	0	8	0	1	0	1	3	1	14
NBS-LRR63	3.3e-63	Bradi5g22187.1	1750	AT3G14470.1, Os04g53160.1	CNL	24	5	8	8	0	0	1	2	4	2	20
NBS-LRR64	4.5e-63	Bradi1g51687.1	942	AT3G07040.1, Os10g04110.1	CNL	2	1	0	1	0	0	0	0	2	0	20
NBS-LRR65	5.7e-63	Bradi2g39547.1	831	AT1G58390.1, Os08g42670.1	NL	16	8	6	2	0	0	0	0	1	0	22
NBS-LRR66	7e-63	Bradi2g36037.1	1562	AT3G14460.1, Os12g29710.1	CNL	8	2	2	1	1	2	0	0	2	0	16
NBS-LRR67	1.1e-62	Bradi3g03878.1	926	AT3G46530.1, Os08g10440.1	CNL	6	0	2	2	0	0	0	2	2	0	8
NBS-LRR68	1.4e-62	Bradi2g39537.1	934	AT3G46730.1, Os11g14380.1	CNL	23	9	3	11	0	0	0	0	7	5	5
NBS-LRR69	3.9e-62	Bradi4g10190.1	1066	AT3G14470.1, Os11g44960.1	CNL	11	0	0	0	1	0	7	3	1	0	17
NBS-LRR70	3.9e-62	Bradi1g22500.1	959	AT3G07040.1, Os07g40810.1	CNL	4	0	1	1	0	0	0	2	0	0	27
NBS-LRR71	7.6e-62	Bradi2g52150.1	910	AT4G26090.1, Os01g57870.1	CNL	3	0	1	2	0	0	0	0	0	0	17
NBS-LRR72	4.1e-61	Bradi4g03005.1	938	AT3G07040.1, Os08g28540.1	CNL	0	0	0	0	0	0	0	0	1	0	22
NBS-LRR73	8.1e-61	Bradi1g29560.1	1073	AT3G14470.1, Os02g25900.1	CNL	25	12	5	4	0	2	0	2	1	1	13
NBS-LRR74	1.5e-60	Bradi5g02360.1	980	AT3G14470.1, Os08g19980.1	CNL	8	0	3	2	0	0	1	2	15	2	3
NBS-LRR75	2.1e-60	Bradi4g16492.1	913	AT3G46730.1, Os11g34920.1	CNL	10	2	4	4	0	0	0	0	5	1	17
NBS-LRR76	1.4e-59	Bradi3g60337.1	1356	AT3G14470.1, Os02g16270.1	CNL	1	1	0	0	0	0	0	0	2	2	20
NBS-LRR77	1.5e-59	Bradi2g03260.1	992	AT3G14470.1, Os01g05620.1	CNL	4	2	2	0	0	0	0	0	1	2	18
NBS-LRR78	6.5e-59	Bradi1g01250.1	988	AT3G07040.1, Os11g46210.1	CNL	30	13	7	4	0	3	0	3	1	3	17
NBS-LRR79	9.1e-59	Bradi2g12497.1	806	AT3G07040.1, Os01g23380.1	CNL	30	7	16	5	2	0	0	0	4	0	8
NBS-LRR80	2.6e-58	Bradi2g60250.1	1211	AT3G14470.1, Os01g71114.1	NL	1	0	0	0	0	1	0	0	8	5	11
NBS-LRR81	2.9e-58	Bradi2g36180.1	1247	AT3G14470.1, Os11g10610.1	NL	1	1	0	0	0	0	0	0	5	6	17
NBS-LRR82	8.9e-58	Bradi3g41870.1	1222	AT3G14470.1, Os08g43000.1	CNL	23	15	1	6	0	0	1	0	0	0	5
NBS-LRR83	2.8e-57	Bradi4g39317.1	1212	AT3G07040.1, Os08g14850.1	CNL	9	2	2	5	0	0	0	0	2	2	22
NBS-LRR84	6.2e-57	Bradi4g21950.1	1215	AT5G35450.1, Os08g14850.1	CNL	2	0	0	2	0	0	0	0	3	2	22
NBS-LRR85	1.1e-56	Bradi4g09597.1	973	AT3G07040.1, Os11g46210.1	CNL	29	3	8	15	0	3	0	0	2	4	14
NBS-LRR86	1.6e-56	Bradi3g28590.1	1902	AT3G14470.1, Os10g33440.2	CNL	0	0	0	0	0	0	0	0	0	1	19
NBS-LRR87	3e-56	Bradi4g06460.1	1180	AT3G14470.1, Os12g32710.1	CNL	2	0	0	0	0	2	0	0	4	4	11
NBS-LRR88	3.3e-56	Bradi1g50407.1	1034	AT3G46730.1, Os06g17880.1	CNL	35	2	13	11	2	0	4	3	1	0	12
NBS-LRR89	8.1e-56	Bradi1g00237.1	940	AT3G14470.1, Os05g16200.1	CNL	0	0	0	0	0	0	0	0	15	2	16
NBS-LRR90	1.2e-55	Bradi2g38987.1	897	AT3G46730.1, Os11g43700.1	CNL	16	5	5	6	0	0	0	0	4	1	9
NBS-LRR91	1.2e-55	Bradi2g60260.1	1353	AT1G69545.1, Os01g71114.1	CNL	13	0	8	5	0	0	0	0	5	2	8
NBS-LRR92	1.9e-55	Bradi2g60230.1	1400	AT1G69545.1, Os01g71114.1	CNL	0	0	0	0	0	0	0	0	3	1	13
NBS-LRR93	1.1e-54	Bradi2g09434.1	1337	AT3G46730.1, Os10g22484.1	XN	19	2	10	5	0	2	0	0	7	7	9
NBS-LRR94	6e-54	Bradi1g27757.1	1079	AT3G14470.1, Os07g29820.1	CNL	2	1	0	1	0	0	0	0	1	0	11
NBS-LRR95	2.6e-53	Bradi4g15067.1	968	AT3G46730.1, Os11g39160.1	CNL	37	15	7	11	0	0	2	2	14	4	18
NBS-LRR96	3.8e-53	Bradi4g06470.1	1272	AT3G14460.1, Os12g32660.1	NL	6	0	2	0	0	2	2	0	3	4	14
NBS-LRR97	1.7e-52	Bradi2g51807.1	1288	AT3G14460.1, Os01g57310.1	CNL	2	2	0	0	0	0	0	0	0	0	18
NBS-LRR98	2.7e-52	Bradi1g67840.1	926	AT4G26090.1, Os03g14900.1	NL	2	0	2	0	0	0	0	0	5	2	8
NBS-LRR99	3.3e-52	Bradi4g17365.1	971	AT3G07040.1, Os09g34160.1	CNL	10	3	4	3	0	0	0	0	8	6	22
NBS-LRR100	2.6e-51	Bradi2g03007.2	1017	AT3G14470.1, Os11g45050.1	CNL	44	3	8	11	4	6	3	9	5	0	18
NBS-LRR101	2.8e-51	Bradi2g03007.1	1034	AT3G14470.1, Os11g45050.1	CNL	50	5	5	13	9	6	3	9	5	0	18
NBS-LRR102	1.1e-50	Bradi1g27770.1	1119	AT3G14470.1, Os07g29810.1	CNL	1	0	1	0	0	0	0	0	10	8	17
NBS-LRR103	2.1e-49	Bradi3g15277.1	887	AT3G46530.1, Os08g28540.1	CNL	10	3	0	7	0	0	0	0	1	5	8
NBS-LRR104	6.8e-49	Bradi2g03020.1	972	AT3G14470.1, Os11g45050.1	CNL	18	4	2	1	1	0	3	7	1	1	9
NBS-LRR105	6.8e-48	Bradi2g37990.1	803	AT3G07040.1, Os01g36640.1	CNL	6	3	2	1	0	0	0	0	0	3	23
NBS-LRR106	2e-47	Bradi2g59310.1	957	AT3G07040.1, Os01g70080.1	CNL	0	0	0	0	0	0	0	0	3	2	14
NBS-LRR107	4e-47	Bradi4g01117.1	1077	AT3G07040.1, Os12g37770.1	CNL	17	5	3	3	0	4	2	0	11	2	14
NBS-LRR108	1.4e-46	Bradi4g28177.1	951	AT3G14460.1, Os09g16000.1	CNL	5	4	1	0	0	0	0	0	0	0	6
NBS-LRR109	9.6e-46	Bradi1g15650.1	1260	AT3G14470.1, Os03g37720.1	CNL	1	1	0	0	0	0	0	0	6	1	15
NBS-LRR110	2.3e-45	Bradi4g24887.1	990	AT3G46530.1, Os11g11550.1	CNL	2	0	0	0	0	0	0	2	3	2	9
NBS-LRR111	6.7e-45	Bradi3g60446.1	885	AT3G46730.1, Os08g28540.1	CNL	4	4	0	0	0	0	0	0	0	0	17
NBS-LRR112	1.1e-44	Bradi4g35317.1	941	AT3G07040.1, Os09g34160.1	CNL	53	50	1	1	0	0	1	0	6	0	17
NBS-LRR113	2.6e-44	Bradi4g36976.1	1077	AT3G46730.1, Os05g40160.1	CNL	11	2	4	3	0	0	0	2	9	0	19
NBS-LRR114	2.7e-44	Bradi5g03140.1	849	AT3G07040.1, Os11g11990.1	CNL	6	0	0	1	1	0	2	2	0	0	9
NBS-LRR115	6e-42	Bradi4g03230.1	842	AT4G33300.1, Os12g39620.1	NL	121	34	25	50	5	2	2	3	1	0	30
NBS-LRR116	5.2e-41	Bradi2g09427.1	1065	AT3G46530.1, Os11g27430.1	CN	27	15	2	8	0	0	0	2	3	2	15
NBS-LRR117	2.2e-40	Bradi1g29434.1	747	AT1G50180.1, Os11g41540.1	CNL	4	2	1	1	0	0	0	0	5	4	25
NBS-LRR118	6.3e-37	Bradi1g01397.1m	944	AT3G46530.1, Os08g28600.1	CNL	12	0	2	4	0	1	4	1	1	0	20
NBS-LRR119	3.1e-36	Bradi1g50420.1	860	AT3G46730.1, Os06g17880.1	CNL	23	8	5	3	2	0	3	2	1	4	21
NBS-LRR120	5.2e-36	Bradi1g00960.3	1062	AT3G14470.1, Os12g03750.1	CNL	3	0	0	0	2	1	0	0	3	5	7
NBS-LRR121	6.1e-36	Bradi1g00960.1	1170	AT3G14470.1, Os12g03750.1	CNL	3	0	0	0	2	1	0	0	3	5	7
NBS-LRR122	2.6e-34	Bradi3g42037.1	752	AT3G46530.1, Os01g21240.1	CN	4	0	0	0	2	1	0	1	7	5	20
NBS-LRR123	2.4e-33	Bradi4g09957.1m	1020	AT3G14470.1, Os06g16790.1	CN	13	5	2	5	0	0	0	1	2	4	11
NBS-LRR124	7.3e-33	Bradi2g03200.1	863	AT3G46730.1, Os01g05620.1	CNL	2	0	2	0	0	0	0	0	7	0	22
NBS-LRR125	3.4e-31	Bradi4g25780.1	784	AT3G46730.1, Os11g17014.1	NL	4	0	0	2	0	0	0	2	0	0	18
NBS-LRR126	1.4e-29	Bradi3g61040.1	1058	AT3G14460.1, Os06g16790.1	CN	5	2	0	2	0	0	0	1	7	1	6

## Sheet: Sheet2
Bradi4g10037.1m1	2	0	1		2	0	1
Bradi4g10037.1m2	27	12	23		27	12	23
Bradi2g39517.1	2	5	2		2	5	2
Bradi1g55080.1	0	5	2		0	5	2
Bradi4g09247.1	16	4	7		16	4	7
Bradi1g29427.2	17	18	10		17	18	10
Bradi1g29427.1	14	18	10		14	18	10
Bradi2g52840.1	2	3	0		2	3	0
Bradi1g29441.1	13	4	2		13	4	2
Bradi5g03110.1	36	0	0		36	0	0
Bradi4g21890.1	35	22	18		35	22	18
Bradi1g01377.1	0	10	7		0	10	7
Bradi4g33467.1	8	0	2		8	0	2
Bradi4g14697.1	3	8	0		3	8	0
Bradi4g01687.1	24	1	0		24	1	0
Bradi4g01687.2	28	1	0		28	1	0
Bradi4g10220.1	1	2	0		1	2	0
Bradi2g39207.1	4	12	11		4	12	11
Bradi1g01257.1	9	13	7		9	13	7
Bradi2g60434.1	1	5	6		1	5	6
Bradi5g22547.1	10	5	5		10	5	5
Bradi2g37166.1	1	3	7		1	3	7
Bradi5g22842.1	16	5	3		16	5	3
Bradi4g38170.1	0	0	1		0	0	1
Bradi2g03060.1	14	20	17		14	20	17
