# Supplementary material for: Genome Wide Analysis of Nucleotide-Binding Site Disease Resistance Genes in Brachypodium distachyon
Source: Comp Funct Genomics. 2012 May 28;2012:418208. doi: 10.1155/2012/418208 (PMC3368180; doi:10.1155/2012/418208)
Supplement: Supplementary file 2 [file 418208.f2.xls]

## Sheet: Sheet1
Non-Regular NBS-LRR	HMMER E-value	IBI	Amino Acid length	Type
NBS-LRR127	1.8e-70	Bradi3g14917.1	1381	CN
NBS-LRR128	3.3e-69	Bradi4g02825.1	554	CN
NBS-LRR129	4.8e-66	Bradi4g10050.1	891	CNL
NBS-LRR130	5.6e-66	Bradi4g02552.1	852	CN
NBS-LRR131	5.9e-66	Bradi3g00757.1	915	CN
NBS-LRR132	7.2e-64	Bradi2g61510.1	614	CN
NBS-LRR133	5.3e-63	Bradi1g29670.1	1160	CNL
NBS-LRR134	1.1e-61	Bradi2g25327.1	1112	XNL
NBS-LRR135	1.4e-61	Bradi4g10150.1	1161	CNL
NBS-LRR136	7.8e-61	Bradi5g01936.1	1132	CNL
NBS-LRR137	1.1e-60	Bradi4g02625.1	849	CNL
NBS-LRR138	2.5e-60	Bradi3g34697.1	898	CNL
NBS-LRR139	5e-60	Bradi5g15565.1	967	CNL
NBS-LRR140	6.9e-60	Bradi4g44637.1	941	CNL
NBS-LRR141	4.6e-59	Bradi2g38827.1	1114	CNL
NBS-LRR142	4.6e-57	Bradi4g44603.1	896	CNL
NBS-LRR143	2.1e-56	Bradi4g44227.1	915	CNL
NBS-LRR144	2.9e-55	Bradi4g44217.1	913	CNL
NBS-LRR145	3.1e-55	Bradi4g44550.2	907	CNL
NBS-LRR146	9.6e-55	Bradi4g09587.1	925	CNL
NBS-LRR147	7.1e-53	Bradi4g12737.1	841	CNL
NBS-LRR148	2.1e-52	Bradi4g44575.1	915	CNL
NBS-LRR149	1.6e-52	Bradi4g07910.1	1078	CNL
NBS-LRR150	1e-51	Bradi2g36150.1	365	CN
NBS-LRR151	1.2e-51	Bradi2g38810.1	1630	CNL
NBS-LRR152	3e-51	Bradi2g38800.1	1068	CNL
NBS-LRR153	1.6e-50	Bradi2g61520.1	887	CNL
NBS-LRR154	4.1e-50	Bradi2g03040.1	463	CNL
NBS-LRR155	2e-49	Bradi4g23880.1	1154	CNL
NBS-LRR156	8e-48	Bradi4g09577.1	1045	CNL
NBS-LRR157	5.8e-47	Bradi2g38987.4	653	XNL
NBS-LRR158	9.8e-47	Bradi4g07027.1	1026	CNL
NBS-LRR159	2.9e-46	Bradi4g02535.1	674	CN
NBS-LRR160	2.2e-44	Bradi3g10370.1	936	CNL
NBS-LRR161	2.2e-43	Bradi4g44560.1m	953	CNL
NBS-LRR162	5.5e-42	Bradi4g15060.1	988	CNL
NBS-LRR163	9.9e-42	Bradi4g02520.1	1411	CNL
NBS-LRR164	1.2e-41	Bradi1g56695.1	1041	CNL
NBS-LRR165	1.9e-41	Bradi3g58937.1	1066	CNL
NBS-LRR166	1.8e-40	Bradi4g02542.1	373	CN
NBS-LRR167	7.2e-40	Bradi2g38790.1	913	CNL
NBS-LRR168	8.2e-40	Bradi4g10197.1	458	CN
NBS-LRR169	2.2e-39	Bradi3g05480.1	921	CN
NBS-LRR170	2.7e-39	Bradi1g29370.1	1138	CNL
NBS-LRR171	4e-39	Bradi1g29267.1	1622	CNL
NBS-LRR172	3e-38	Bradi3g05470.1	789	CNL
NBS-LRR173	5.5e-37	Bradi3g60980.1	219	CNL
NBS-LRR174	6.6e-37	Bradi3g60250.1	1150	CNL
NBS-LRR175	1e-36	Bradi4g40727.1	919	CNL
NBS-LRR176	8.5e-36	Bradi2g52450.1	923	CNL
NBS-LRR177	1.5e-35	Bradi4g02490.1	1640	CNL
NBS-LRR178	3.7e-35	Bradi2g38900.1	1063	CNL
NBS-LRR179	4.9e-35	Bradi4g25810.1	916	CNL
NBS-LRR180	3e-33	Bradi4g02500.1	911	XN
NBS-LRR181	1.2e-32	Bradi1g29634.1	461	CNL
NBS-LRR182	3e-31	Bradi2g52430.1	398	N
NBS-LRR183	2.7e-31	Bradi4g25040.1	895	NL
NBS-LRR184	1.3e-30	Bradi1g29360.1	1287	CNL
NBS-LRR185	1.7e-30	Bradi4g02530.1	254	N
NBS-LRR186	1.7e-30	Bradi4g07902.2	509	CN
NBS-LRR187	1.9e-30	Bradi4g07902.1	571	CN
NBS-LRR188	4.4e-30	Bradi4g12680.1	661	CNL
NBS-LRR189	3.2e-29	Bradi2g41930.1	381	CN
NBS-LRR190	4.4e-29	Bradi2g37190.1	625	NL
NBS-LRR191	1.1e-28	Bradi4g17135.1	351	CN
NBS-LRR192	1.3e-25	Bradi3g58951.1	739	NL
NBS-LRR193	3.2e-25	Bradi1g51320.1	878	CNL
NBS-LRR194	6.6e-25	Bradi1g34430.2	996	CNL
NBS-LRR195	1.9e-24	Bradi5g22150.1	152	N
NBS-LRR196	2e-20	Bradi5g02860.1	918	CNL
NBS-LRR197	3.3e-20	Bradi4g11920.1	833	CNL
NBS-LRR198	4.3e-19	Bradi4g00610.1	1898	CNL
NBS-LRR199	5.7e-19	Bradi2g18840.1	502	CN
NBS-LRR200	1.3e-18	Bradi2g39560.1	362	CN
NBS-LRR201	3.5e-18	Bradi3g34967.1	946	CN
NBS-LRR202	1.1e-17	Bradi4g24852.1	440	CN
NBS-LRR203	1.2e-17	Bradi1g58950.1	497	N
NBS-LRR204	1.4e-17	Bradi4g24857.1	482	N
NBS-LRR205	1.8e-17	Bradi2g39390.1	321	CN
NBS-LRR206	6.1e-17	Bradi4g24845.1	442	N
NBS-LRR207	6.2e-17	Bradi4g24845.2	444	N
NBS-LRR208	9.2e-17	Bradi3g45550.1	494	N
NBS-LRR209	2.9e-16	Bradi5g01480.1	506	CN
NBS-LRR210	3.4e-16	Bradi4g44590.1	314	CN
NBS-LRR211	5.6e-16	Bradi2g48487.1	503	CN
NBS-LRR212	7.3e-16	Bradi1g58980.1	511	CN
NBS-LRR213	7.4e-16	Bradi4g13480.1	1132	CNL
NBS-LRR214	8.1e-16	Bradi4g44590.2	312	CN
NBS-LRR215	9.6e-16	Bradi2g48467.1	511	CN
NBS-LRR216	1.3e-15	Bradi1g53930.1	490	N
NBS-LRR217	1.8e-15	Bradi4g16340.1	498	N
NBS-LRR218	1.9e-15	Bradi4g02525.2	466	CN
NBS-LRR219	2.6e-15	Bradi2g48480.1	438	N
NBS-LRR220	4.2e-15	Bradi4g02525.5	454	CN
NBS-LRR221	4.5e-15	Bradi4g02525.1	462	CN
NBS-LRR222	5.3e-15	Bradi4g13980.1	262	CN
NBS-LRR223	1.2e-14	Bradi4g13540.1	1032	CNL
NBS-LRR224	1.6e-14	Bradi5g00870.1	1058	N
NBS-LRR225	1.8e-14	Bradi3g58944.1	1111	CNL
NBS-LRR226	3e-14	Bradi4g13470.1	1134	CNL
NBS-LRR227	4.2e-14	Bradi3g22540.1	450	NL
NBS-LRR228	5e-14	Bradi4g13550.1	1134	CNL
NBS-LRR229	5.6e-14	Bradi3g07315.1	407	CN
NBS-LRR230	5.5e-13	Bradi1g58940.1	497	CN
NBS-LRR231	2e-12	Bradi3g15990.1	485	CN
NBS-LRR232	2.1e-12	Bradi2g36030.1	1381	CNL
NBS-LRR233	2.1e-12	Bradi4g24930.1	443	CN
NBS-LRR234	2.6e-12	Bradi3g16000.1	503	CN
NBS-LRR235	2.9e-12	Bradi4g22740.1	163	XN
NBS-LRR236	4.2e-12	Bradi4g14120.1	273	XN
NBS-LRR237	9.2e-12	Bradi1g34370.1	496	CN
NBS-LRR238	9.2e-12	Bradi3g21190.1	497	CN
NBS-LRR239	1.5e-11	Bradi5g00440.1	314	CN
		Sum of each type	CNL	55
			CN	37
			XNL	2
			XN	3
			NL	4
			N	12
