# Supplementary material for: Genome Wide Analysis of Nucleotide-Binding Site Disease Resistance Genes in Brachypodium distachyon
Source: Comp Funct Genomics. 2012 May 28;2012:418208. doi: 10.1155/2012/418208 (PMC3368180; doi:10.1155/2012/418208)
Supplement: Supplementary file 3 [file 418208.f3.xls]

## Sheet: Sheet1
NO	Modified NBS-LRR gene models	Annotion Errors	Type	Modified amino acid length	NCBI homolog	Protein sequence corresponding to the modified gene model
1	Bradi4g10037.1m1	Gene fusion	CNL	1027		MAAILDSLVGSCAKKLQEIITEEAVLILGVKEDLRELQRTMTQIQYFLIDAEQRRTEESAVNNWLGELRDAMYYADDIIDLARSEGCKLLAKSPSSSRKSTSCIGRTFFTCIPDVQKRHKIAVQIRDFNAKLQKISELGERFLKLQNMQPKAEVKRVKQMRTSYLLEPNLVGKETLHACKRLVELVIAHKEKKAYKVGIVGTGGVGKTTLAQQIYNDQKIKGNFSNQAWICVSQDYSDTALLKEILRNFGVHHENNETVGELSSKLATAISDRSFFIVLDDVWVPEVWTNLLRIPLHDAAAGVILVTTRHDTVAHSIGVEDMQRVDLMPEDVGLELLWKSMNIKEEKDVENLRNIGMDIVRKCGGLPLAIKVTASVLATKEKTENEWRKILDRGAWSMG…
2	Bradi4g10037.1m2	Gene fusion	CNL	1014		MAIILDSLVRSCVKKLQDIITEEAILILGVEKDLRELQQTMNQIQLFLNDAEQRRTEESAVKSWLGKLKDAMYDADNIIDLARFEGGKLLAESPSSSKMSTTCNGISFFSCIPNIQRRHKIAVKIRSFNVELEKVSKLGERFLKLQIMQPKQEVRATKQMKTCSLVEPNLVGKETLHACSRLVELVLAHKNSKAYKLGVVGTGGVGKTTLAQKIYNDRKIKGAFSNQAWICVSQEYSEVALLKEVLRNLGVNQEQGETVGELSSKLAAATQGKSFFLVLDDVWHPEVWTNLLRTPLHAAAAGVILVTTRHDTVAQSIGAEDMHRVKLMPADVGWELLLKSMNINEEKDVQNLKGIGMNIIHKCGGLPLAIKLIGSVLATKEKTENEWRRLLNRSAWSKR…
3	Bradi1g00227.1m	Incorrect intron/exon splice boundaries or numbers of exons	CNL	784		MAAILDSLVGSCAKKLQEIITEEAVLILGVKEDLRELQRTMTQIQYFLIDAEQRRTEESAVNNWLGELRDAMYYADDIID LARSEGCKLLAKSPSSSRKSTSCIGRTFFTCIPDVQKRHKIAVQIRDFNAKLQKISELGERFLKLQNMQPKAEVKRVKQM RTSYLLEPNLVGKETLHACKRLVELVIAHKEKKAYKVGIVGTGGVGKTTLAQQIYNDQKIKGNFSNQAWICVSQDYSDTA LLKEILRNFGVHHENNETVGELSSKLATAISDRSFFIVLDDVWVPEVWTNLLRIPLHDAAAGVILVTTRHDTVAHSIGVE DMQRVDLMPEDVGLELLWKSMNIKEEKDVENLRNIGMDIVRKCGGLPLAIKVTASVLATKEKTENEWRKILDRGA…
4	Bradi4g44560.1m	Incorrect intron/exon splice boundaries or numbers of exons	CNL	915		MELATGAMRSLLPKLVELVEGEYKLQTGVKKDVESLSRELESIEVALAKVAEVPLDKLDKQVRLWATNVKQLSYEMEDIV DSFMVRVEGSEPDADLKRSKRFRKKIANFFKKGKTRHQIADKIQDIKVRVKEVADLRDRYKVDDVHANQAATNTIDPRMI NLFKDQKELVGIEEPRKDLIKRLMEGGDVVSNSKLQLKIVSIFGFGGLGKTTLAKAVYDKLQEEFICKAFISVGQKPNLK KAFMDILRQLDKNSYLNATMLDELQLIDELRELLENKRYLIVIDDIWDKSSWNIMKYALIDSNCGSRIITTTRIFEVAEE ADDVYKQKPLSSATSKELFYTRLSIGKCKIISGQPIEISGKILQKCGGVPLAIITIASLLASKPWEDWSEVYDSI…
5	Bradi1g01397.1m	Incorrect intron/exon splice boundaries or numbers of exons	CNL	944		MAPVVSAALGALGPLLTKLGGLLAGEYGRLKGVRREIRSLESELISMHAALKEYTELEDPGGQVKAWISLVRELAYDTED VFDKFIHQLHKGCVRRGGFKEFLGKIALPLKKLGAQRAIADHIDELKDRIKQVKELKDSYKLDNISCSASRHTAVDPRLC ALFAEEAHLVGIDGPRDDLAKWMVEEGKMHCRVLSIVGFGGLGKTTLANEVSRKIQGRFDCRAFVSVSQKPVIKKIIKDV ISKVPCPDGFTKDIDIWDEMTAITKLRELLQDKRYVRYLVVIDDIWSASAWDAIKYAFPENNCSSRIIFTTRIVDVAKSC CLGRDNRLYEMEALSDFHSRRLFFNRIFGSEDCCSNMLKKVSDEILKKCGGLPLAIISISSLLANIPVAKEEWEK…
6	Bradi4g09957.1m	Wrong terminal exon	CN	1020		MTALGIGMKAVGWVASPIISELFKKSSAYLSFNASQKLLQLAPKVLLLERAMEVFDKIPNRPRLEQLFRD LKSAFYEAEDILDDVEYQYLKKKIQDDKFKSDGIEPLHKTGWVKKLLPKAPLLKNKETGMPKKELKDSLE KIEDIINSAYKFVEHLNLSTVSTFNGSHAGPANSGGAVTTAAPPPVVIGRDKDCDKIIEMLHEKEGEGQP DANNGVCYSVVGIHGIGGSGKSTLAQLVCAREKKDKQEKMEGHFDLIMWVHVSQSFSVSAIFKEIFEAAT GSPCPQLTSLNVLQDKLEEELHGRRFLLVLDDVWYDIQDERQQGNLQLILSPLKAGQAGSKILVTSRTEE ALLVLGAAKPRCIPISDLDDNAFLNLLMHYALEGAVIDDHDRRR…
	Genomic loci information of our revised gene models
				exon1 start	exon1 end	exon1	intron1	exon2 start	exon2 end	exon2	intron2	exon3 start	exon3 end	exon3	intron3	exon4 start	exon4 end	exon4	intron4	exon5 start	exon5 end	exon5	intron5	exon6 start	exon6 end	exon6
1	Bradi4g10037.1			9627133	9625678	1456	124	9625554	9625493	62	178	9625315	9624314	1002	1575	9622739	9622677	63	860	9621817	9621766	52	1360	9620406	9617300	3107
	Bradi4g10037.1m1			9627133	9624050	3084
	Bradi4g10037.1m2			9620344	9617300	3045
2	Bradi4g09957.1			9424179	9423802	378	366	9423436	9422453	984	372	9422081	9420752	1363	109	9420643	9420573	71
	Bradi4g09957.1m			9424179	9423802	378	366	9423436	9422481	956	45	9422436	9420708	1729
3	Bradi4g44560.1			47912225	47911348	878	185	47911163	47910834	330	812	47910022	47909881	142
	Bradi4g44560.1m			47922875	47922043	833	505	47921538	47919636	1903
							0
4	Bradi1g00227.1			59775	61313	1539
	Bradi1g00227.1m			59775	61272	1498	1967	63239	64094	857
5	Bradi1g01397.1			934542	935365	824
	Bradi1g01397.1m			936810	937632	823	534	938166	940177	824
		exon1 size	intron1 size	exon2 size	intron2 size	exon3 size	intron3 size	exon4 size	intron4 size	exon5 size	intron5 size	exon6 size
1	Bradi4g10037.1	1456	124	62	178	1002	1575	63	860	52	1360	3107
	Bradi4g10037.1m1	3084
	Bradi4g10037.1m2											3045
2	Bradi4g09957.1	378	366	984	372	1363	109	71
	Bradi4g09957.1m	378	366	956	45	1729
3	Bradi4g44560.1	824
	Bradi4g44560.1m	823	534	824
4	Bradi1g00227.1	1539
	Bradi1g00227.1m	1498	1967	857
5	Bradi1g01397.1	824
	Bradi1g01397.1m	823	534	824
