# Supplementary material for: Genome Wide Analysis of Nucleotide-Binding Site Disease Resistance Genes in Brachypodium distachyon
Source: Comp Funct Genomics. 2012 May 28;2012:418208. doi: 10.1155/2012/418208 (PMC3368180; doi:10.1155/2012/418208)
Supplement: Supplementary file 5 [file 418208.f5.xls]

## Sheet: Sheet1
No	IBI	chromosome	genome start	genome stop	No.of each gene cluster	summary
1	Bradi1g00960.1	1g	672678	678601
	Bradi1g00960.3	1g	675064	678601
	Bradi1g01250.1	1g	831228	836715
	Bradi1g01257.1	1g	843158	847380	4
2	Bradi1g01250.1	1g	831228	836715
	Bradi1g01257.1	1g	843158	847380		linked
	Bradi1g01377.1	1g	920907	926091		8 genes in 26814bp
	Bradi1g01387.1	1g	928529	932276
	Bradi1g01397.1m	1g	936810	940177
	Bradi1g01407.1	1g	936810	940782	6
3	Bradi1g29427.2	1g	25004334	25007623
	Bradi1g29427.1	1g	25004334	25007956
	Bradi1g29434.1	1g	25010870	25013462
	Bradi1g29441.1	1g	25020793	25024286
	Bradi1g29560.1	1g	25121039	25124786
	Bradi1g29658.1	1g	25186509	25192493
	Bradi1g29658.2	1g	25186509	25192493	7
						15 genes in chromosome 1
4	Bradi2g03007.1	2g	2183626	2187323
	Bradi2g03007.2	2g	2183626	2187628
	Bradi2g03020.1	2g	2197209	2200662
	Bradi2g03060.1	2g	2211101	2215797
	Bradi2g03200.1	2g	2307348	2310326	5
5	Bradi2g38987.1	2g	39192770	39196874
	Bradi2g39091.1	2g	39261350	39264778
	Bradi2g39207.1	2g	39332321	39336263
	Bradi2g39247.1	2g	39366464	39371231	4
6	Bradi2g39517.1	2g	39697722	39704967
	Bradi2g39537.1	2g	39727474	39731540
	Bradi2g39547.1	2g	39732460	39736011
	Bradi2g39847.1	2g	39894441	39897720	4
7	Bradi2g60230.1	2g	57590184	57595457
	Bradi2g60250.1	2g	57612062	57616124
	Bradi2g60260.1	2g	57636669	57642234
	Bradi2g60434.1	2g	57761415	57765543	4
						17 genes in chromosome 2
8	Bradi4g09957.1m	4g	9420708	9424179
	Bradi4g10017.1	4g	9588079	9591745
	Bradi4g10030.1	4g	9595925	9600320
	Bradi4g10037.1m2	4g	9617300	9620344
	Bradi4g10037.1m1	4g	9624050	9627133	5
9	Bradi4g10017.1	4g	9588079	9591745
	Bradi4g10030.1	4g	9595925	9600320
	Bradi4g10037.1m2	4g	9617300	9620344
	Bradi4g10037.1m1	4g	9624050	9627133
	Bradi4g10060.1	4g	9645777	9649391
	Bradi4g10171.1	4g	9771971	9776753
	Bradi4g10180.1	4g	9781825	9787473	7
10	Bradi4g10037.1m2	4g	9617300	9620344
	Bradi4g10037.1m1	4g	9624050	9627133		linked
	Bradi4g10060.1	4g	9645777	9649391		11 genes in 422207bp
	Bradi4g10171.1	4g	9771971	9776753
	Bradi4g10180.1	4g	9781825	9787473
	Bradi4g10190.1	4g	9812046	9815801	6
11	Bradi4g10060.1	4g	9645777	9649391
	Bradi4g10171.1	4g	9771971	9776753
	Bradi4g10180.1	4g	9781825	9787473
	Bradi4g10190.1	4g	9812046	9815801
	Bradi4g10207.1	4g	9832550	9835669
	Bradi4g10220.1	4g	9839854	9842915	6
						11 genes in chromosome 4
summary	43 genes in 11 gene cluster
	The superclusters were indicated in yellow.
